# Supplementary material for: Identification of a robust biomarker LAPTM4A for glioma based on comprehensive computational biology and experimental verification
Source: Aging (Albany NY). 2024 Apr 12;16(8):6954–89. doi: 10.18632/aging.205736 (PMC11087115; doi:10.18632/aging.205736)
Supplement: Supplementary Table 1 [file aging-16-205736-s002.xlsx]

## Sheet: Supplementary Table 1
Supplementary Table 1. All genes of the turquoise module.
turquoise-module-gene
gene	connectivity
CDC5L	600.206
AMMECR1L	587.104
CRK	571.641
GID8	570.011
ATF6	569.904
GEMIN5	566.269
AAR2	564.902
SF3B4	559.786
SRBD1	554.68
BRAP	554.465
SMU1	553.628
ZBTB6	553.122
MAPRE1	550.063
HNRNPA0	549.116
OSBP	547.069
TGFBRAP1	535.15
ZNF689	534.648
CSTF2	533.657
KCTD5	533.464
ZBTB9	533.262
PDCL	532.559
TSN	531.796
RAB14	531.439
ZBTB39	529.571
INTS5	528.058
URB2	523.599
ZNF319	523.365
ZW10	521.976
POLDIP2	520.788
DHX33	518.967
TRPC4AP	518.837
PAK2	518.627
SDE2	518.262
PPP6C	517.997
ZNF426	516.242
AP3M1	514.54
PWP1	513.385
GPATCH11	513.234
DCAF7	512.185
MOCS3	511.918
UBE2J1	511.509
DCAF12	511.152
ASB7	511.035
STARD7	510.845
C5orf51	509.527
SAP130	509.421
TOP1	509.119
WBP11	509.051
ZNF629	507.377
WDR43	507.373
LRRC58	507.032
SNX12	507.004
MFAP1	506.978
GOLPH3	506.842
CD2BP2	505.269
GNL3L	503.685
ZNF2	502.844
TTC27	501.512
ZKSCAN3	497.662
PDE12	496.978
DOLK	496.549
GCC1	496.014
POLR2D	495.668
WDR5B	494.994
APEX1	494.871
WDCP	494.264
CCDC71	493.643
MRPL44	493.056
UBE2R2	492.413
ZBTB5	490.075
USP38	487.744
ZKSCAN2	487.602
CBLL1	487.223
HNRNPCP2	486.977
RAB10	486.321
TMEM33	485.907
POLR1B	485.687
UTP3	485.359
GNAI3	484.656
MMGT1	484.336
SLC30A6	484.18
PAK1IP1	483.921
ZNF148	482.605
COIL	482.167
ILF2	481.157
ABCF1	480.249
UGGT1	479.919
TAF9B	479.227
MAVS	479.16
TNPO1	478.499
VPS72	478.32
SRFBP1	477.685
YTHDF1	476.899
CSTF2T	476.489
STAM2	474.837
THAP11	474.158
PGGT1B	474.121
BBS10	473.378
METTL13	472.611
PPM1G	472.261
YTHDF3	472.239
RNF139	471.493
KDM4D	470.424
RNF20	469.736
ERLIN1	469.261
EXOC2	468.989
XRCC5	468.47
SP2	468.186
APH1A	467.974
SMG8	467.757
DBR1	467.358
GTF3C4	467.248
GTF2E1	466.967
HMGN4	466.191
RBM15B	465.978
RBBP9	465.821
STAU1	465.528
SEC23B	465.243
SEC24B	464.958
CRNKL1	464.001
MRPS18B	463.958
MARS2	463.925
N4BP2	463.512
RTCB	463.263
IFNAR1	462.944
BRK1	462.249
LIX1L	461.154
ZNF830	461.029
MIEF1	460.334
TAF7	459.671
TMEM184C	459.577
NUFIP1	459.569
VMA21	459.512
WDR36	459.236
ABRAXAS2	458.096
ZNF79	457.633
ZNF212	456.581
ZBTB33	456.569
MIPEPP3	456.443
ZBTB2	455.784
TFCP2	454.417
MRPL50	453.739
TP53RK	453.27
POLR1A	452.99
XRCC6	452.921
DNAAF2	452.876
DCTN4	452.788
NOA1	452.088
POMK	451.457
RAD23B	450.776
ZNF572	450.607
ZNF777	449.694
CFAP97	449.492
WDR35	449.343
GSPT2	449.234
ALG1L6P	449.218
ANXA9	449.186
RNF216	448.571
CPNE3	448.249
C6orf47	447.688
MSL2	447.358
ZNF501	446.441
APEX2	445.807
EIF2AK1	445.445
SEC24A	444.874
CCNT1	444.781
AP001000.1	444.744
ZKSCAN4	444.402
TMEM203	444.188
EFL1	443.094
SMAD5	443.004
CDKAL1	442.852
RF00019	442.718
CDYL	442.511
NUP43	442.477
ACBD3	442.007
POLDIP3	441.785
BROX	441.321
PEX12	440.97
MAGEF1	440.853
FANCF	439.933
ZBTB22	439.266
NUP155	439.121
POFUT1	438.735
THG1L	438.524
SOCS4	437.815
XRN2	437.735
NCOA3	436.881
POLR3B	436.592
FAF2	436.378
IMPAD1	436.257
TNFAIP1	435.964
GEMIN4	435.798
ZNF669	434.445
MUT	434.342
VANGL2	433.758
RALA	433.466
CBX8	433.36
ZNF70	433.031
SMARCA5	432.929
GANAB	432.727
SUGT1P1	432.637
AL031722.1	432.612
KHDRBS1	432.547
VEZF1	430.714
FAM120C	430.696
SLX4IP	430.555
GAS5-AS1	429.803
PARS2	429.625
KPNA3	429.584
ZFP3	429.48
TUFM	429.053
DAD1	428.705
GPKOW	428.637
ALDH1B1	428.499
HNRNPH2	427.831
ARF6	427.74
RBM12	426.724
FBXO30	426.195
ZNF486	425.711
HADHA	425.699
MRPL45	425.692
WDR3	421.683
AGPS	421.481
GLE1	421.346
GALNT1	421.036
RPN1	420.998
RNU6-722P	420.789
RTL6	420.068
AL513165.1	419.383
AL354892.2	419.358
ZNF282	419.319
ZKSCAN8	419.235
YIPF6	418.442
NCOA5	418.112
TTPAL	417.454
BUD13	416.686
MAML2	416.314
HNRNPKP1	416.217
ZNF92	415.912
ASNA1	415.725
NELFB	415.671
RPN2	415.455
TGS1	415.424
DOLPP1	415.317
USP13	415.238
DDX28	415.071
ZNF687	414.934
ZFAND3	414.611
BLOC1S4	414.005
SGPL1	413.839
NCOA4	413.819
RNF5	413.59
TMX1	413.536
PBDC1	413.322
CBL	413.234
PRKAR2A	412.7
ABT1	412.054
ZDHHC15	411.963
ADNP2	411.809
AL355574.1	411.762
WNK3	411.677
CPSF3	411.316
ALG10B	410.831
C6orf62	410.802
DEGS1	410.746
TMEM115	409.63
HSD17B1P1	408.892
VCPIP1	408.859
ZNF619	408.855
VPS18	408.626
UBR7	407.78
ZNF260	407.523
NRAS	406.983
TFAM	406.97
EEFSEC	406.852
AC104532.2	406.351
ZNF557	406.282
RP2	406.177
C1orf56	405.568
LAPTM4A	405.535
HPS6	405.505
PPP1R8	405.16
AC022107.1	404.972
GLO1	404.789
PATL1	404.531
KIAA1143	404.054
SLC35A4	403.514
ENTPD7	402.924
SLC39A7	402.128
SLC35F6	402.108
AL449212.1	402.053
TOPORS	402.012
MED13	401.999
PRPF4	401.957
SUCO	401.591
DDX21	401.307
EXOC8	399.815
ZNF280C	399.174
SNX4	399.031
TCEAL8	398.764
ZNF624	397.71
PUS3	397.568
ZNF813	397.557
ZKSCAN5	397.348
SURF4	397.053
ZNF281	396.897
HSD17B10	396.571
AC010332.1	396.242
ZNF597	396.218
PIGM	396.11
SLC39A6	395.702
ETF1	395.297
TMEM167A	394.745
SOX2	393.482
BMPR1A	393.188
RRP1B	392.93
SLC31A1	392.641
CSE1L	392.62
BPNT1	392.12
EIF4EBP2	391.836
UBAP1	391.762
STAG2	391.704
TRAFD1	391.587
PPP1R10	391.497
SF3A3	391.149
NEDD1	390.828
RNF2	390.803
TRMT12	390.747
NDC1	390.657
ZXDB	390.423
RPA1	389.396
DPY19L1P2	389.324
CHST14	389.181
PTGES3P3	389.083
TMX2P1	388.906
IPO7	388.514
UTP20	388.445
AL132989.1	387.862
SYAP1	387.843
CLP1	387.629
ZSWIM3	387.382
TM9SF3	387.105
RPIA	386.973
GNA13	386.657
FAM32A	386.597
ZXDA	386.345
ARMCX1	385.753
SEC61A1	385.645
TMEM263	385.438
AGPAT5	385.208
SRSF8	385.183
TXN2	385.158
TCTN3	384.87
NOX1	384.648
MEPCE	384.261
AL589880.1	384.22
RIOK1	384.137
TRIM35	383.552
FANCE	383.391
ABL1	383.34
ACLY	383.17
ZNF398	382.709
RRP15	382.647
AC053527.1	382.348
ATRN	381.442
LINC00674	381.314
ALKBH8	381.169
LSM3	381.12
FOXO3B	380.672
CCDC47	380.634
GSR	380.533
YRDC	380.405
JAGN1	380.352
TTC28	379.698
AC135506.1	379.046
DCLRE1B	378.881
ZBTB10	378.83
ARHGAP31-AS1	378.328
EID1	377.831
MUL1	377.397
PATZ1	377.286
REXO4	377.282
TCEA1P2	376.733
SLC16A2	376.692
RFXAP	375.917
ZBTB26	375.253
ZNF100	375.116
TBCAP1	374.879
EIF2S2	374.629
STT3B	374.469
INCA1	374.387
DCLRE1A	374.286
TIPRL	374.229
ZSWIM1	373.998
UBIAD1	373.691
NBN	373.446
RTL8B	373.419
BAZ1B	373.279
TWNK	373.072
CDV3	373.027
LYSMD1	372.733
AC008764.2	372.273
TEAD1	372.254
JRKL	371.858
AC005586.1	370.72
AC090114.2	370.191
ZNF502	369.571
MARCKS	369.291
SF3B5	368.139
VKORC1L1	368.101
GFPT1	367.847
AC011477.3	367.507
TP53INP1	367.371
ZBTB24	367.215
NUFIP2	365.996
TEX261	365.789
NOC3L	365.732
CENPQ	365.547
RAB8B	365.461
HMGB1P10	365.415
SMC2	365.352
WDR82	365.261
THRAP3	364.873
ZNF43	364.476
MIR573	364.438
ZC3H12C	363.938
ZNF197-AS1	363.414
PRPF6	363.364
TOR3A	363.317
CRSP8P	363.237
ALDH18A1	362.666
AC026254.2	362.245
RRP9	361.926
PANX1	361.719
MTCH2	361.069
CHMP4B	360.947
ASXL2	360.493
TSSK5P	360.173
CCDC97	359.601
TOR1AIP1	359.423
BMT2	358.808
SKIL	358.725
HSPA13	358.211
MRPL57	358.061
ZNF425	358.03
FAM199X	357.87
NUP153	357.666
MRPS35	357.522
RAC1	356.955
AZIN1	356.916
SOWAHC	356.811
HERPUD2	356.399
SWT1	356.282
AL035587.1	356.091
NDUFB11	355.923
TRAF6	355.891
POLR1E	355.852
AP2B1	355.172
TRMT10C	354.733
DPYSL3	354.581
TET2	354.481
TMEM104	354.113
PIGW	354.074
CBX5	354.042
AKIRIN2	353.929
ANKRD50	353.771
DNTTIP1	353.712
PCDH17	353.681
ZNF805	353.545
SPATA5	353.128
CANX	353.08
LINC01560	353.066
TNPO3	352.858
DHX40	352.756
MRPS10	352.682
PPT1	352.62
ZNF543	352.524
YIPF5	352.496
MAGED2	352.013
SETD1A	351.804
RPL22P24	351.47
ZNF616	350.578
MOB3A	350.138
ZNF555	350.047
ZSCAN25	349.993
MTX1P1	349.587
UHRF1BP1	348.779
TWISTNB	348.741
KLF12	348.568
ZNF592	348.478
AC245100.4	348.258
MEX3A	348.153
RBM15	347.763
MSI1	347.666
ZNF24	347.05
C8orf37	346.865
PLAGL2	346.827
RBL1	346.797
SMARCA5-AS1	346.795
PDCD4-AS1	346.734
MIR4292	346.64
TMEM187	346.21
DHFR2	346.094
ZNF699	346.021
IFIT5	345.688
MIS18A	344.765
KCTD20	344.387
XPR1	344.359
PARP11	344.351
ZBTB11-AS1	344.287
LRRC37A16P	344.04
PSKH1	343.91
FEM1B	343.738
RFX7	343.406
NMD3	343.093
ZBED4	342.809
RMI1	342.575
PTPN1	342.145
BNIP3L	342.042
PTTG1IP	341.971
SH3BGRL	341.778
ZNF14	341.729
TMED7	341.444
BLOC1S5	340.706
PGBD4	340.68
ANTXR1	340.525
CYP20A1	340.468
SLC25A15	339.836
DNAJC3	339.464
KIF7	339.184
ZCCHC3	338.964
AC060780.3	338.917
PARP4	338.688
AL137784.3	338.444
DENR	338.058
RING1	337.752
QSER1	337.005
SMIM15	336.959
ZNF35	336.93
ZNF253	336.219
ABHD4	335.885
RRAGA	335.717
HEATR1	335.508
STYX	335.43
VBP1	335.335
ZNF275	334.603
TNKS2	334.392
MTPN	334.061
C4orf46	333.845
SFT2D2	333.337
MRPS14	333.295
FASTKD5	333.076
POU3F3	332.777
LMAN2	332.136
C3orf38	331.757
TMED2	331.378
CNPPD1	330.636
METTL18	330.614
DHTKD1	330.539
LAPTM4B	330.384
ZNF408	330.253
C19orf54	329.916
ASF1A	329.814
HNRNPAB	329.71
SF3B6	329.458
ARHGAP42	328.984
AC106782.2	328.639
MEMO1P1	328.573
AP001318.2	328.174
C5orf15	327.635
YTHDF2	327.503
LDAH	327.339
IPMK	326.874
LRRC59	326.768
SEC63P1	326.483
TIGD2	326.14
FOXRED2	326.115
LMAN2L	325.719
TMEM106B	325.699
DAG1	325.256
ZNF678	325.055
ZNF107	324.741
ATP7A	324.197
AC008537.2	324.013
AC006333.2	323.888
MGME1	323.85
AL133243.2	323.719
AC008267.3	323.67
NCSTN	323.659
LRCH2	323.635
ZC3H4	323.467
AC010834.3	323.159
PYGO1	323.058
GTF2IP23	322.847
ZNF121	321.976
KLHL8	321.553
LCLAT1	321.552
ALG1L10P	321.273
MIS12	321.257
TAOK1	321.244
SMCR8	321.236
AC078882.1	320.722
AC244517.7	320.433
MRPL39	320.239
LCMT2	320.065
FAM8A1	319.998
RNF113A	319.971
CCDC137	319.95
PSMB5	319.74
KCTD11	319.519
NUCKS1	319.423
ARSB	319.145
FKBPL	319.097
IRAK1	319.02
KLHL28	318.639
TFB2M	317.955
CASTOR2	317.76
HCFC2	317.721
SLC35C1	317.664
SCFD2	317.525
UEVLD	317.423
HNRNPF	317.114
NOTCH1	316.966
AC027644.1	316.956
WDR88	316.511
RNU6-516P	316.369
ZBTB12	316.368
ACTR2	315.799
MTDH	315.651
FITM2	315.12
RPA2	315.043
RBSN	314.433
RNF138	314.335
LBR	314.111
TMEM43	314.088
AP001092.1	313.944
AL121603.2	313.889
FAM57A	313.407
CYP2U1	313.249
AGO1	313.188
GTF3C6	313.138
TMBIM6	312.917
ACOX1	312.615
POLH	312.421
SYT11	312.41
AC078846.1	311.906
ZNF627	311.234
RBM43	311.218
FLJ37453	311.156
ARHGAP31	310.626
ZNRF2P1	310.543
SCCPDH	310.326
RNU6-510P	310.219
MIR3685	310.054
PURB	310.011
CRCP	310.01
FER	309.483
ZNF670	309.371
ZNF660	309.233
MIR635	309.199
JAM2	309.183
SP1	309.155
AC024075.1	309.064
TOMM22	308.57
MIB1	308.044
TTC30B	307.931
SEL1L	307.437
PCDHB9	307.396
CCDC50	307.308
NUS1P1	306.784
AC018647.2	306.695
XPO4	306.58
ERP44	306.542
CCNJ	306.094
RAB41	305.887
CREB3	305.69
ALOX12	305.126
FAM168A	304.952
UBXN7	304.768
SP4	304.622
PRPF38A	304.557
GDI2	304.054
AC099850.1	303.982
UBL3	303.883
PHETA1	303.852
TMEM69	303.493
KLHL9	303.424
TIMM22	302.969
POLE3	302.873
AC117409.1	302.455
MIR1254-1	301.833
ERLEC1	301.736
CUEDC2	301.438
TTC30A	301.033
CALR	300.984
AC093627.5	300.927
PCYOX1	300.769
EIF2AK2	300.58
ZNF480	300.561
GLUD1P3	300.502
RFWD3	300.393
UBE2H	300.217
DDR1	299.974
TMEM30A	299.876
GSTCD	299.841
TROVE2	299.651
DCAF16	299.521
FDX1	298.961
AC010186.3	298.953
DAZAP2P1	298.646
PRKD1	298.581
EIF2S3	298.152
ESF1	297.94
SOX12	297.188
KRCC1	296.643
SEPHS1	296.429
EIF4BP7	296.319
TOR1B	296.22
ARHGEF6	296.146
BACH1	295.729
NSDHL	295.57
PAFAH2	294.923
LINC02585	294.679
WASL	294.606
ZHX2	294.488
KBTBD7	294.471
FAM200A	294.131
USP1	293.774
KLF3	293.667
ABCC4	293.44
MIR647	293.4
NEMP1	293.023
IL17RD	292.961
HARBI1	292.837
TBCCD1	292.722
GOLM1	292.65
DCP1A	292.439
LNPK	292.316
RF01233	292.038
SPTY2D1	291.832
MRPS26	291.574
ZNF845	291.365
TRIM24	291.345
SPDYE18	291.311
SNORD62B	291.3
TRIM4	291.179
IFT52	291.134
THNSL1	290.752
NDUFA1	290.684
C1GALT1C1	290.663
SH3GL1	290.33
AL133520.1	289.65
TMEM60	289.596
LMAN1	289.58
FOXK1	289.256
RNU6-925P	288.813
ZNF711	288.717
AF131215.5	288.629
NLGN1	288.62
FICD	288.251
AL132800.1	288.147
LYRM7	288.094
AL358472.4	288.029
ATF7IP	288.002
ALYREF	287.496
TMED10	287.352
GTF2F1	287.172
CCT3	287.144
RCC2	287.088
URB1	286.939
YTHDF2P1	286.579
CLCN3	286.515
ZMPSTE24	286.503
PRKD3	286.425
AC008438.1	286.344
ZNF853	286.311
ZNF622	286.275
EIF3A	286.09
GPR173	285.648
CMTM6	285.363
TMEM9B	285.203
NAP1L1P1	285.163
AL604028.1	284.851
PHF13	284.67
CKAP4	284.633
NANP	284.404
AC093724.1	284.317
RNY4P10	284.31
AC130689.1	284.285
AL353743.1	283.871
ERG28	283.813
PDIK1L	283.463
JADE3	283.422
VARS	283.338
AC084337.1	283.206
AP000759.1	282.745
RNU6-415P	282.518
DSCC1	282.302
TSSK6	282.18
POMGNT2	282.137
CMTM3	282.083
YWHAQ	282.023
TRIP11	281.742
CORO1C	281.443
CBX3P2	280.934
PGM2	280.331
LSM2	280.122
AGBL5-IT1	280.048
AL353804.1	279.869
SEPHS2	279.828
KIAA1549	279.363
EEA1	279.285
AC120114.1	279.148
CCDC134	279.085
VAV2	278.863
TMEM14C	278.594
AL365181.3	278.542
TRPS1	278.426
AC006449.6	278.344
TXNDC16	278.034
ZKSCAN1	277.908
APMAP	277.779
MIR25	277.762
ZNF888	277.641
ZMYM1	277.23
MIR570	277.097
ZNF526	277.022
AC073896.3	276.918
AC010615.1	276.906
SIGMAR1	276.435
TP53	275.925
RAB29	275.873
LRRC40	275.8
MANEA	275.581
EMC7	275.462
LDLRAD3	275.405
ZNF354C	275.032
AC012513.3	275.015
ZMAT2	274.945
DCAKD	274.71
AC087521.3	274.67
AC009113.1	274.585
C6orf120	274.445
AC079305.3	274.151
SPTSSA	273.906
CTSO	273.776
SMAD1	273.597
PNMA1	273.323
MCM3	273.069
ZNF843	273.063
RANBP6	273.036
UFL1	273.019
PLEKHF2	272.998
YJU2	272.734
CDKN1B	272.638
YBX1P10	272.347
NDUFS6	271.733
ENOPH1	271.479
PHF5A	271.435
B4GALT5	270.673
OLA1P1	270.352
SNX18	269.735
ICK	269.365
SH3RF3	268.641
ZNF362	268.26
RF00569	268.219
FARSA	267.873
BCHE	267.818
ADPRHL2	267.748
ERH	267.668
CRKL	267.656
ZNF786	267.639
PGD	267.601
PXMP4	267.592
ADO	267.493
NUDT19	267.161
SWSAP1	266.829
DERA	266.739
KRBA2	266.738
SOS1-IT1	266.665
ZC3HAV1	266.54
MIDN	266.064
ZNF614	265.571
MAPK1	265.372
OCIAD1-AS1	265.333
LRP5	264.834
PKN1	264.782
RNF180	264.711
AC105206.2	264.625
SLC17A5	264.528
PSAP	264.471
INTS7	264.274
AC087501.4	264.041
S1PR2	263.996
GRIK4	263.56
GM2A	263.177
ATXN7L3B	262.888
TSPY26P	262.335
ZNF681	262.3
BCL9	261.889
SNORD100	261.831
RAB9A	261.709
PM20D2	261.705
C22orf23	261.654
SP2-AS1	261.467
NDST1	261.303
ARL5B	260.938
ZSCAN12	260.811
YES1	260.687
MAGEH1	260.568
TRMT2B	259.996
SAMD8	259.675
UTP25	259.351
VMAC	259.168
SLC35B4	258.665
AP003392.4	258.604
POU3F2	258.378
MLEC	257.468
WASF2	257.427
YWHAZP4	257.306
COA7	257.07
ZNF416	256.919
GMEB1	256.916
AC132938.3	256.889
AC002524.1	256.718
CADM4	256.662
AC026877.1	256.483
AC012442.2	256.461
CXXC4	256.204
STK32A-AS1	256.012
AC012360.3	255.868
AL158801.5	255.587
ACTG1P1	255.189
CHCHD3P3	254.959
SMARCC1	253.879
ZNF490	253.737
C1orf94	253.675
ANKRD18EP	253.481
RWDD4P2	253.455
THAP8	253.362
ZNF256	253.281
AC079922.1	253.246
AC004112.1	252.982
TCF12	252.869
ZNFX1	252.61
CTTNBP2NL	252.524
MIR590	252.471
AL122023.1	252.431
AL133227.1	252.36
ARIH2OS	252.123
AL121574.1	252.087
NAGLU	252.068
BLVRA	252.032
TIGD5	251.966
CAMSAP2	251.874
LINC02245	251.772
AC006378.1	251.707
AC021321.1	251.036
AC026471.4	251.02
U52111.1	251.018
RNU6-30P	250.715
MIR186	250.685
XPOT	250.6
MTM1	250.549
AC019069.1	250.537
SH3GLB1	250.256
ATL3	249.71
ZNF236-DT	249.447
RCBTB2	249.309
TCF3	249.292
RCOR1	249.221
ARL13B	249.135
RNU6-1016P	249.084
GTF2F2	248.836
AL512343.2	248.718
AC107032.2	248.581
PRR11	248.263
DDOST	248.166
CACFD1	248.063
AMOTL1	247.976
AKIRIN1	247.862
SMC1A	247.832
AL136368.1	247.703
C18orf54	247.503
UBTD2	247.192
MIR4740	246.815
MAGT1	246.732
DCLK2	246.503
SBDS	246.503
RPL36AL	245.69
ZNF311	245.459
SOCS6	245.087
CWF19L2	244.916
CANT1	244.832
SAYSD1	244.825
RPL13AP20	244.41
NATD1	244.318
GNB4	244.263
AC011444.1	244.14
AC109454.2	243.744
TPI1P2	243.707
AC073389.1	243.639
RPL41P5	242.747
ZBTB21	242.681
AC116914.2	242.321
FAM111A-DT	242.25
DSEL	242.096
RNU6-1053P	241.893
TRIAP1	241.309
PRXL2C	240.992
AC023632.2	240.803
KDELC1	240.696
AC036214.2	240.528
SOX21-AS1	240.413
AC025171.1	240.332
MIR4263	240.197
PMVK	240.014
SLC35B2	239.737
CAMTA1-DT	239.633
TMEM248	239.5
MAGED1	239.436
ZBED3	239.401
AL080316.1	239.229
GOLIM4	239.186
C17orf53	239.01
TOMM20L	238.67
AL670729.1	238.363
ZEB1	238.293
FNDC3A	237.406
AC025181.2	237.201
AL355987.5	236.928
AC006449.2	236.716
HTATSF1	236.167
AL157932.1	235.997
AC068473.5	235.607
TET3	235.051
USP5	235.028
LRP10	234.944
MIR641	234.569
FALEC	234.543
TOMM20	234.511
SOX6	234.324
NFIX	234.177
ZNF454	233.763
PHLPP1	233.733
USP27X-AS1	233.73
HCG15	233.642
NFIB	233.617
PPP1R14BP3	233.604
UGDH-AS1	233.585
C17orf100	233.576
TMPO-AS1	233.065
NOP10	232.868
AC022150.2	232.844
AL355480.1	232.393
LRRC42	232.214
KIAA1958	232.148
ACER3	232.027
RAD18	231.334
AL035413.2	231.106
DIRC2	230.669
AC012447.1	230.285
CHST11	230.176
AL513550.1	230.031
TSKU	229.887
PRELID3B	229.73
ABCA1	229.574
C17orf113	229.574
AC104117.3	229.51
PSMB3	229.378
DIAPH2	229.314
RSPH3	229.115
CHAC2	228.862
RRM2B	228.637
EEF2	228.533
RNU6-850P	228.379
COMMD2	228.175
BCL10	228.051
H1F0	228.039
F2R	227.952
AP001052.1	227.845
AC046185.2	227.612
MIR3677	227.438
AC079921.1	227.322
CBX4	227.256
FAAP24	227.25
PRR13P5	226.942
POP7	226.781
SGO2	226.762
FEN1	226.718
KIF11	226.689
TMEM169	226.411
SMAD9	225.792
AC144530.1	225.731
AL121820.1	225.591
FDXACB1	225.52
AC008124.1	225.199
NPM3	225.086
FSBP	224.808
MARCKSL1	224.636
RFTN2	224.395
SH3RF3-AS1	224.047
IDH1	223.878
TMEM123	223.575
SLC30A7	223.526
H6PD	223.518
MCM6	223.418
FCHSD2	223.379
SAP30	223.08
LINC02062	222.71
AC026471.6	222.669
AC097359.2	222.046
CAP1	221.757
MRM1	221.545
CALCRL	221.489
AC108449.2	221.213
KDELR2	221.088
AC087276.1	220.768
FIGN	220.653
TSPAN6	220.594
NRIP1	220.589
ITGAV	220.566
LEPROT	219.848
PELI1	219.777
AC093620.1	219.732
RSU1	219.703
ABCD1	219.618
PAPSS1	219.467
GPM6B	219.467
HMGN2P17	219.233
SOX21	218.899
CYP2F2P	218.399
SNORD6	218.396
KIAA2013	218.299
LDB1	218.154
AC087741.3	218.108
ZNF792	218.048
MMP16	217.912
AL158166.1	217.7
AC093484.4	217.514
GLIPR1L1	217.478
AL162595.1	217.449
FAM181B	217.396
GPR161	216.963
AC007406.5	216.923
UHRF1	216.837
DYRK2	216.827
MIR93	216.641
AP5B1	216.32
SLC30A1	215.996
AL589765.4	215.888
CHST3	215.57
OLIG2	215.471
RIPK2	215.316
AC107956.1	215.187
ADAMTS6	215.133
RFC2	214.666
NXT2	213.952
MED18	213.629
ILF3-DT	213.499
ABI1	213.471
AC114956.1	213.045
TRAM1	212.881
ATP6V0E2-AS1	212.832
DNER	212.577
TMEM178B	212.558
SPPL2A	212.385
KDM7A	212.136
SDHAP3	211.992
PFN4	211.846
NRBF2	211.749
KLHL12	211.161
ZNF93	211.123
AC010598.1	210.905
SLC23A2	210.891
GLTPD2	210.863
ATAD2	210.797
ZNF462	210.532
LPP-AS2	210.463
ABHD15	210.454
AC063948.1	210.183
AL390955.2	210.108
HSPA5	210.085
TMEM181	210.066
RNU6-703P	210.023
SLC35F2	209.884
COQ2	209.731
AL109918.1	209.528
SLC35D1	209.528
AC011468.4	209.515
PRDX5	209.423
SMARCA1	209.116
AC126407.1	208.789
AC113189.3	208.71
AC040977.1	208.591
USP51	208.497
ITPRIPL2	208.385
AC004951.2	208.341
RIN2	208.248
PLCB3	208.175
ZMIZ1	208.111
TCF7L1	207.856
KDELR1	207.847
B3GALT6	207.811
STK17B	207.785
NACA3P	207.379
AC064807.4	207.359
AL137779.2	207.235
ANKFN1	207.193
ACOXL	207.185
AC024558.1	206.955
AC012442.1	206.87
AC009227.1	206.757
PLEKHM3	206.428
ATP6V0E1	206.16
HIP1	206.012
PFN1	205.443
MIR5581	205.439
LINC00928	205.417
AL121753.1	205.364
RELL1	205.09
POP1	204.819
LIN9	204.695
ARMH4	204.621
ETV6	204.433
RCC1	204.222
HIST1H4I	203.778
EDEM2	203.693
AL031289.1	203.689
RNU6-277P	203.678
ECHS1	203.111
NUDT12	203.053
ENAH	202.929
AC242842.1	202.673
AC112777.1	202.356
AL603839.2	202.303
TMEM231P1	202.118
NPAS3	201.927
AL357140.2	201.807
RAP2A	201.654
RNU6-322P	201.524
POLH-AS1	200.787
PRRX1	200.594
CEP83-DT	200.365
PRELID1P1	200.314
TSPAN11	200.24
ABCA3	199.958
WARS2	199.908
CDC25A	199.604
PELI2	199.586
B3GNT10	199.052
BEND3	199.036
AL627402.1	199.023
CENPI	198.895
AC138207.2	198.8
AC142472.1	198.514
PCNA	198.269
RNF39	197.887
SH3PXD2B	197.81
SNX7	197.764
RFC3	197.482
ALG1L8P	197.424
UBE2E1-AS1	197.337
KLHL25	197.274
AC019080.5	197.233
FBXO5	197.194
SCD5	197.193
SPDYE12P	197.085
NCAPG2	197.076
HMGN1P37	196.711
AC005229.4	196.5
SNORD101	196.078
PLGRKT	196.066
AC022916.1	195.683
ARL6IP5	195.667
MIR3176	195.528
FAM86FP	195.411
SLC16A13	195.402
HNRNPA1P12	195.369
CDCA7	195.19
ALDH9A1	195.084
SMC3	194.985
PPP1CB	194.963
OSGIN2	194.833
AC098583.1	194.712
AL359541.1	194.693
TRMT5	194.688
SERINC5	194.618
RAB39A	194.417
AC034231.1	194.288
NLGN3	194.274
RPS4X	193.851
AL590714.1	193.801
RRAGD	193.783
DNMBP	193.482
ANO6	193.458
AC011481.1	193.393
C15orf39	193.182
NAP1L1P3	193
AC107294.3	192.944
C10orf143	192.589
PDIA4	192.468
EIF4EBP1	192.406
SUCLG2	192.111
ERAP1	191.987
SALL1	191.844
AC073343.1	191.791
BARD1	191.713
GINS1	191.692
ASTN1	191.665
FEM1C	191.53
ARHGEF26	191.428
ZNF22	191.369
FRMD8	191.357
REST	191.122
AC097534.1	190.397
C8orf33	190.205
NHSL1	190.184
AC018752.1	189.977
MAFG-DT	189.914
LRIG1	189.72
ELOVL5	189.656
RNU7-123P	189.428
RHNO1	189.342
ARF4	189.062
SOX4	188.876
RNA5SP82	188.789
NRM	188.787
CLIC4	188.685
GAN	188.621
BMP2	188.541
AP006296.1	188.448
SPATA25	188.401
NLGN2	188.338
AC107294.2	187.933
NTN1	187.597
MAPKAPK2	187.2
AC091492.1	187.003
TNFRSF21	186.941
AC083799.1	186.91
LRRN1	186.852
SNORD69	186.808
MYC	186.774
AC091982.1	186.76
HEY1	186.536
KIAA1147	186.52
VANGL1	186.464
MIR4489	186.237
DNAJB9	186.198
PCDHB10	186.064
TRAPPC13P1	185.398
HMGN2P41	185.217
TGIF2	184.991
AC006213.3	184.961
ZIK1	184.886
BUB1	184.808
AC104447.1	184.738
FBXO36	184.7
LRRC37A5P	184.378
RTL8C	183.779
PSAT1	183.727
DDIAS	183.434
KDM5A	183.278
PARD3B	183.255
AP001462.1	183.249
CCDC167	183.156
BACH1-IT1	183.145
AL121987.1	182.901
MIR3124	182.852
AL391422.4	182.781
AC079305.1	182.446
CENPH	182.41
AC243562.2	182.329
AL662791.1	182.21
GTF2IP14	182.055
VN1R42P	182.018
AC091390.3	181.942
ERI1	181.906
FAM185BP	181.867
TTC3P1	181.839
AK3P3	181.777
SLCO5A1	181.74
AL133523.1	181.604
MRTO4	181.55
DTL	181.513
RAP2C-AS1	180.619
AC107027.3	179.868
CRTC3-AS1	179.648
GLIPR2	179.535
RPL7P38	179.524
TMEM164	179.42
WNT5A-AS1	179.308
WDR76	179.152
AC090907.1	178.705
ARL13A	178.691
RAP2B	178.675
MB21D2	178.651
MYCL	178.516
AL390728.2	178.495
TMEM97	178.484
RCOR2	178.333
RNU7-171P	178.324
MIR106B	178.109
MYDGF	177.836
THSD7A	177.521
KIF18B	177.468
RASA3	177.335
TICAM1	177.267
PPM1D	177.247
ZFHX4	177.08
AC002310.6	177.015
ITPR2	176.967
HSF2BP	176.873
KCNA6	176.801
SNRPB	176.72
TIMELESS	175.518
AC011290.1	175.239
SPSB4	175.177
AC005845.1	174.945
OPHN1	174.839
AC011477.7	174.603
C1orf226	174.578
RPL10P3	174.473
SYDE1	174.408
EZH2	174.399
SLC44A2	174.288
MEF2C-AS2	174.243
RPL41P1	174.239
PYCR1	173.951
MIR3186	173.627
LINC00945	173.56
LINC02391	173.516
KIF20B	173.376
TEX22	173.303
PYGB	173.162
KIF4A	173.109
PNO1	173.108
KDM7A-DT	172.743
KIF15	172.69
AC093249.2	172.61
ZNF649	172.574
PDRG1	172.355
MIR589	172.122
CKAP2L	171.918
ZNF718	171.565
NEDD4	171.514
XRCC2	171.43
AP002784.1	171.429
MIR4477B	171.299
AC007249.2	171.069
IRF2BPL	171.048
KRT8P12	171.041
GLIS2	171.038
AURKA	170.747
ACKR3	170.625
MIS18A-AS1	170.268
SNORD19	170.163
AC021739.5	170.14
LINC01144	170.129
ZWINT	169.981
UBE2L6	169.959
AC068025.1	169.66
AC010618.2	169.629
FMR1-IT1	169.575
TPX2	169.487
EIF1P6	169.383
BCAN	169.21
FZD3	169.209
AL645608.6	169.157
MIR3671	169.141
PRTFDC1	169.109
SF3A1	169.104
CKAP2	169.099
AL390728.3	168.971
C9orf147	168.945
NLGN4X	168.748
TOB2	168.633
NDC80	168.474
ZNF367	167.685
ARID5B	167.655
UNG	167.618
SNORD99	167.443
BMP7	167.429
CBFB	167.358
RPL23AP64	167.357
EFNA2	167.275
AC087301.1	167.259
SPC25	167.087
AC004918.3	167.069
GPR75	166.967
GOLGA2P8	166.865
DSCAM	166.743
RPS4XP22	166.722
CLIP2	166.688
POC1A	166.663
FOXN2	166.646
VAT1	166.442
AC017015.2	166.423
KIFC1	166.287
AC006978.1	166.17
ZBTB20-AS4	165.728
AL109741.1	165.363
AC005833.2	165.333
AC096649.2	165.284
ZNF829	165.232
GLUD2	165.202
FERMT1	164.985
MED29	164.93
SLC12A9-AS1	164.593
KIAA1211	164.542
AC007376.2	164.369
CHEK1	164.168
TICRR	163.9
SNORD46	163.753
AC011444.3	163.407
FTOP1	163.403
PALM2-AKAP2	163.346
CCDC160	163.048
AC092919.2	162.993
GNG12-AS1	162.868
CHPF2	162.71
GTSE1	162.703
SLC25A5	162.553
AL031118.1	162.401
SKA3	161.966
MIR331	161.949
AL158835.2	161.902
AC083867.1	161.667
MIR659	161.479
AC025211.1	161.234
RILPL2	161.025
ACVR2B-AS1	161.015
PABPC5	160.985
DAP	160.931
TNIP2	160.499
LMNB2	160.493
AC018521.6	160.459
AL391422.1	160.239
PEA15	160.142
AC018738.1	160.123
FRMPD3	159.781
SH3BP4	159.725
DTX3L	159.655
MCCD1P2	159.606
AP005433.1	159.545
LRR1	158.898
TIMM23	158.772
HJURP	158.765
TAPBP	158.468
DNAJC1	158.44
KANTR	158.103
RRM1	158.078
AC116535.1	157.901
AL136040.1	157.849
RNU6-945P	157.785
VPS37D	157.776
AL928654.1	157.587
PHLDA1	157.292
HSDL2	157.16
WDR31	157.133
AC087071.2	157.129
AL445187.1	157.019
ZNF229	156.859
LINC01152	156.509
AL355480.3	156.453
AC092123.1	156.211
GIPC3	156.208
AASS	156.084
SLC25A1	155.918
SMAD9-IT1	155.913
KIF20A	155.693
NOTCH2	155.654
RACGAP1	155.556
RND2	155.473
GRIK3	155.447
SOX8	155.447
RNU6-94P	155.221
E2F3	155.142
ID2	155.017
MIR3682	154.894
UBTD1	154.802
AC120036.3	154.742
RALGAPA1P1	154.725
AC018809.2	154.688
CEP55	154.513
AC018638.3	154.423
AC092666.2	154.402
ASCL1	154.106
LINC01352	154.007
TRIM32	153.948
AC012313.4	153.807
EIF3FP3	153.806
UGDH	153.797
SOX9	153.728
HMGN2P15	153.351
LHFPL4	153.296
H2AFX	153.213
CNN3	153.183
DSN1	153.052
ZSCAN20	152.992
AC008280.3	152.799
SLC12A4	152.761
ZNF217	152.635
ZNF184	152.55
AC015849.3	152.447
TRIP13	152.251
AC010320.3	152.248
TENM4	152.244
RNA5SP118	152.157
KIF2C	151.915
OSBPL11	151.771
ORC1	151.474
AC007996.1	151.404
LINC01816	151.342
HES6	151.179
AC084757.3	151.134
PTPRJ	151.046
AC023157.3	151.006
MCFD2P1	150.975
PPP1R18	150.973
MELK	150.961
CDCA5	150.886
AC073878.1	150.832
AC011503.2	150.744
KIF14	150.701
CROCCP2	150.474
PDLIM5	150.472
CDK1	150.255
CDCA2	150.208
AL118505.1	150.14
WARS2-IT1	150.092
MEX3D	150.053
RRM2	149.982
TET1	149.945
AC113935.1	149.874
NCAPD2	149.667
RAB31	149.667
PODXL2	149.635
AC138356.1	149.622
ZNF823	149.501
PDGFC	149.373
AC010536.1	149.345
TTK	149.286
DLGAP5	149.227
POLR2A	149.145
NCAPG	149.028
ASF1B	148.837
AL353194.1	148.774
FJX1	148.704
AC008443.6	148.616
AP003465.1	148.503
AC007938.1	148.384
AC008739.2	148.365
AC025171.2	148.356
AL021707.4	148.301
ZNF578	148.217
STIL	148.205
REEP3	148.203
TUBB	147.852
SLC25A13	147.691
NCBP2-AS1	147.562
CCNB2	147.324
C16orf96	147.182
SOX11	146.748
MIR4482	146.242
USP46-AS1	146.217
PBK	146.108
KIF18A	146.091
MT-TP	145.944
AC009166.1	145.928
ID4	145.815
RNU6-1011P	145.797
NUF2	145.709
LMNB1	145.684
AL354920.1	145.428
RNU6-678P	145.271
PMP2	145.221
MIR6835	145.108
AC021188.1	145.084
GNMT	145.051
PPP1R12A-AS1	145.032
DDX39BP2	144.975
ALG1L7P	144.891
AC243562.1	144.813
TIMP3	144.562
GPC2	144.514
CDCA4	144.473
NRARP	144.386
GALNT13	144.35
AL132657.1	144.271
ABHD13	144.27
CSF1	144.235
FHL3	144.008
ESPL1	143.918
AC112907.2	143.903
ATP5F1B	143.774
CENPL	143.733
RAD51	143.733
CDCA8	143.73
DGCR2	143.474
AP001767.3	143.429
PXDC1	142.963
SLC7A1	142.804
WLS	142.395
MOSPD1	142.331
HASPIN	142.327
MKI67	142.293
HNMT	142.24
AP003119.2	142.115
DCX	142.004
ANKRD61	141.979
YBX1	141.928
AC231981.1	141.928
AC132942.1	141.915
RNU6-856P	141.856
AL031186.1	141.582
AC005670.1	141.561
AC091271.1	141.559
RNA5SP219	141.372
PTPN11	141.331
HNRNPA1P8	141.245
AC006511.3	141.023
LINC01126	140.373
RNU6-611P	140.195
LRRN3	140.164
ADGRG1	140.076
AC106782.5	139.971
AP003392.1	139.713
PTPRZ1	139.696
NCAPH	139.687
WNT5A	139.666
KNL1	139.594
AC012146.3	139.442
RF00410	139.363
LIFR	139.153
ZMAT3	139.143
CNNM3-DT	139.08
RNU6-531P	138.834
RNA5SP474	138.794
CDC45	138.777
NKAIN3	138.607
EFNB1	138.512
AC104561.2	138.379
IDH2	138.264
TNFRSF19	138.242
HNF4G	138.187
MIR219A1	138.113
AC007619.1	138.107
SNORD124	138.09
MAP7D3	138.062
YWHAZP5	137.913
MIR4453HG	137.772
ALCAM	137.71
NEIL3	137.69
MCM5	137.676
AC012558.1	137.399
NCAM2	137.219
AP001626.1	137.102
RN7SL336P	137.027
BCKDHB	136.991
LINC01003	136.898
B3GNT9	136.885
RAB3IL1	136.833
AC131235.3	136.73
HSP90AB2P	136.682
MCM4	136.591
KAT2B	136.584
AC000068.1	136.413
SKA1	136.289
AC009309.1	136.167
AL161421.1	136.144
SNORD14A	136.074
TOX	136.018
CASP3	135.92
CENPA	135.896
FAM110B	135.842
RPS23P1	135.785
TSPAN12	135.619
AC092437.1	135.572
AC026356.1	135.388
AC120049.1	135.384
AL442663.4	135.274
VCAN	135.232
RNU6-762P	135.169
ZNF491	135.162
TRIM56	135.012
EBF4	134.968
SEPSECS	134.723
SGO1	134.716
BCL2L11	134.685
AC073389.3	134.586
MPRIPP1	134.458
AC009271.1	134.377
SNORD83A	134.283
E2F2	134.267
PRTG	134.197
AL359853.2	134.009
OXCT1-AS1	133.781
SDAD1P1	133.453
WDR34	133.445
AGA	133.344
AC016405.3	133.243
SHD	133.114
MAPKAPK3	133.054
AL035458.1	132.733
IQGAP3	132.678
HSPD1P4	132.631
LRRC8A	132.598
TMOD4	132.542
KIRREL1	132.497
UBALD2	132.362
HEG1	132.35
RNU6-118P	132.338
CDC25C	132.3
AL365181.2	132.24
AURKB	132.137
TOB2P1	132.006
ELK3	131.956
HLA-W	131.934
ZNF114	131.861
AC115223.1	131.841
APC2	131.776
AP000866.1	131.716
ADRB2	131.682
CDH20	131.573
TRIM14	131.557
MT-TY	131.511
AC104561.1	131.406
SPSB1	131.406
AC138356.2	131.249
HMMR	131.127
SULF2	130.913
AP000553.1	130.741
LINC00237	130.539
CYP3A5	130.517
AP003119.3	130.372
AP006621.2	130.262
NADK2-AS1	129.961
UST	129.809
RNA5SP508	129.6
PRKCA	129.442
ANKIB1	129.196
SMOC1	129.168
ODC1	129.128
ZNF436	129.051
AL158152.1	128.746
MIR4786	128.435
AC008608.2	128.431
AC008982.2	128.403
ZNF727	128.247
LIMS1	128.141
TXNIP	128.12
PIMREG	127.952
RPLP0	127.893
LRRTM3	127.802
AL161911.1	127.479
AC073046.1	127.412
RNA5SP111	127.403
MMP15	127.394
FRAT1	127.227
ZNF30-AS1	127.177
AL049552.1	127.156
DBF4	126.963
VWA2	126.962
AC096540.1	126.861
Z97989.1	126.843
AC012065.5	126.763
DEFB131B	126.708
MR1	126.676
AC139768.1	126.649
PTGER4P2	126.634
AL138921.2	126.543
AC012640.2	126.422
ALG13-AS1	126.323
AC087752.3	126.274
TIMP2	126.119
SLC16A1	125.821
LINC01415	125.812
CDT1	125.788
RNU7-49P	125.761
SERINC1	125.658
AC000123.3	125.51
CDC20	125.497
SLC16A9	125.434
AC099792.1	125.385
AC016747.1	125.359
KRR1P1	124.889
MASP1	124.785
AL139384.1	124.777
AC083864.2	124.73
CASKIN2	124.666
AL513534.1	124.653
SKA2P1	124.608
PSPN	124.387
AC024145.1	124.215
EZR	124.185
AP001351.1	124.002
AC011451.2	123.784
TOP2A	123.684
KCNN3	123.641
STK17A	123.529
AL078644.1	123.512
GPC4	123.367
TPM3P6	123.14
GINS2	123.042
ZNF837	122.994
TWSG1	122.871
AC073111.1	122.733
RNU6-1223P	122.709
DSCAML1	122.693
DTYMK	122.517
AC103810.3	122.5
AL157395.1	122.384
EFS	122.231
TROAP	122.115
NES	122.039
EEF1E1P1	121.911
PLIN3	121.885
AL512422.1	121.85
AL683813.1	121.794
C20orf96	121.657
ZNF32-AS1	121.571
RF01241	121.481
ESCO2	121.407
AC253536.3	121.385
TBC1D8-AS1	121.263
AC092687.3	121.258
AC104596.1	121.24
AL590666.2	121.155
MIR4666A	120.864
INKA2	120.801
HNRNPA1P38	120.783
ANOS1	120.743
NBPF2P	120.7
AC100778.2	120.687
NDUFB7	120.542
MIR181A2HG	120.408
AC103923.1	120.369
KBTBD8	120.277
PLK4	120.158
ACTG1	120.133
RPL21P28	119.915
C19orf48	119.893
NOP53-AS1	119.89
AL139274.2	119.588
AC093536.1	119.398
ZFHX3	119.362
MIR4322	119.284
HSD17B8	119.233
HMGB3	119.212
GALNT10	119.19
AC022211.2	119.168
REEP4	119.138
AC080188.1	119.083
HAS2	119.048
ANKRD10-IT1	118.911
ZKSCAN7-AS1	118.84
AC006213.5	118.777
PAG1	118.667
LANCL1-AS1	118.151
AC090589.3	117.965
ERCC6L	117.945
DNAJA1	117.919
CETN4P	117.875
AC096887.1	117.757
RHOQP2	117.745
AL022341.1	117.734
Z97633.1	117.576
GPC6	117.501
LINC00471	117.468
LINC00391	117.442
PGRMC1	117.309
AP001324.1	117.177
PHYHIPL	117.177
AL603839.3	117.101
MEX3B	117.019
AL590133.1	116.977
MDFI	116.915
IQCA1-AS1	116.819
CCDC71L	116.811
AC080100.1	116.763
LOXL3	116.719
SLC7A5	116.584
UBE2C	116.494
LINC01715	116.467
AL157823.2	116.449
EIPR1-IT1	116.399
LINC00638	116.159
AL031709.1	116.151
BX293535.1	116.046
MCM10	116.044
FLRT1	115.954
ASPM	115.786
SNORA5C	115.615
AC074135.1	115.44
RNU7-140P	115.225
[truncated: 3,682 more rows]
