# Supplementary material for: Identification of a robust biomarker LAPTM4A for glioma based on comprehensive computational biology and experimental verification
Source: Aging (Albany NY). 2024 Apr 12;16(8):6954–89. doi: 10.18632/aging.205736 (PMC11087115; doi:10.18632/aging.205736)
Supplement: Supplementary Table 2 [file aging-16-205736-s003.xlsx]

## Sheet: Supplementary Table 2
Supplementary Table 2. Top 5% of key genes in turquoise modules.
turquoise-5%hubgene
gene	connectivity
CDC5L	600.206
AMMECR1L	587.104
CRK	571.641
GID8	570.011
ATF6	569.904
GEMIN5	566.269
AAR2	564.902
SF3B4	559.786
SRBD1	554.68
BRAP	554.465
SMU1	553.628
ZBTB6	553.122
MAPRE1	550.063
HNRNPA0	549.116
OSBP	547.069
TGFBRAP1	535.15
ZNF689	534.648
CSTF2	533.657
KCTD5	533.464
ZBTB9	533.262
PDCL	532.559
TSN	531.796
RAB14	531.439
ZBTB39	529.571
INTS5	528.058
URB2	523.599
ZNF319	523.365
ZW10	521.976
POLDIP2	520.788
DHX33	518.967
TRPC4AP	518.837
PAK2	518.627
SDE2	518.262
PPP6C	517.997
ZNF426	516.242
AP3M1	514.54
PWP1	513.385
GPATCH11	513.234
DCAF7	512.185
MOCS3	511.918
UBE2J1	511.509
DCAF12	511.152
ASB7	511.035
STARD7	510.845
C5orf51	509.527
SAP130	509.421
TOP1	509.119
WBP11	509.051
ZNF629	507.377
WDR43	507.373
LRRC58	507.032
SNX12	507.004
MFAP1	506.978
GOLPH3	506.842
CD2BP2	505.269
GNL3L	503.685
ZNF2	502.844
TTC27	501.512
ZKSCAN3	497.662
PDE12	496.978
DOLK	496.549
GCC1	496.014
POLR2D	495.668
WDR5B	494.994
APEX1	494.871
WDCP	494.264
CCDC71	493.643
MRPL44	493.056
UBE2R2	492.413
ZBTB5	490.075
USP38	487.744
ZKSCAN2	487.602
CBLL1	487.223
HNRNPCP2	486.977
RAB10	486.321
TMEM33	485.907
POLR1B	485.687
UTP3	485.359
GNAI3	484.656
MMGT1	484.336
SLC30A6	484.18
PAK1IP1	483.921
ZNF148	482.605
COIL	482.167
ILF2	481.157
ABCF1	480.249
UGGT1	479.919
TAF9B	479.227
MAVS	479.16
TNPO1	478.499
VPS72	478.32
SRFBP1	477.685
YTHDF1	476.899
CSTF2T	476.489
STAM2	474.837
THAP11	474.158
PGGT1B	474.121
BBS10	473.378
METTL13	472.611
PPM1G	472.261
YTHDF3	472.239
RNF139	471.493
KDM4D	470.424
RNF20	469.736
ERLIN1	469.261
EXOC2	468.989
XRCC5	468.47
SP2	468.186
APH1A	467.974
SMG8	467.757
DBR1	467.358
GTF3C4	467.248
GTF2E1	466.967
HMGN4	466.191
RBM15B	465.978
RBBP9	465.821
STAU1	465.528
SEC23B	465.243
SEC24B	464.958
CRNKL1	464.001
MRPS18B	463.958
MARS2	463.925
N4BP2	463.512
RTCB	463.263
IFNAR1	462.944
BRK1	462.249
LIX1L	461.154
ZNF830	461.029
MIEF1	460.334
TAF7	459.671
TMEM184C	459.577
NUFIP1	459.569
VMA21	459.512
WDR36	459.236
ABRAXAS2	458.096
ZNF79	457.633
ZNF212	456.581
ZBTB33	456.569
MIPEPP3	456.443
ZBTB2	455.784
TFCP2	454.417
MRPL50	453.739
TP53RK	453.27
POLR1A	452.99
XRCC6	452.921
DNAAF2	452.876
DCTN4	452.788
NOA1	452.088
POMK	451.457
RAD23B	450.776
ZNF572	450.607
ZNF777	449.694
CFAP97	449.492
WDR35	449.343
GSPT2	449.234
ALG1L6P	449.218
ANXA9	449.186
RNF216	448.571
CPNE3	448.249
C6orf47	447.688
MSL2	447.358
ZNF501	446.441
APEX2	445.807
EIF2AK1	445.445
SEC24A	444.874
CCNT1	444.781
AP001000.1	444.744
ZKSCAN4	444.402
TMEM203	444.188
EFL1	443.094
SMAD5	443.004
CDKAL1	442.852
RF00019	442.718
CDYL	442.511
NUP43	442.477
ACBD3	442.007
POLDIP3	441.785
BROX	441.321
PEX12	440.97
MAGEF1	440.853
FANCF	439.933
ZBTB22	439.266
NUP155	439.121
POFUT1	438.735
THG1L	438.524
SOCS4	437.815
XRN2	437.735
NCOA3	436.881
POLR3B	436.592
FAF2	436.378
IMPAD1	436.257
TNFAIP1	435.964
GEMIN4	435.798
ZNF669	434.445
MUT	434.342
VANGL2	433.758
RALA	433.466
CBX8	433.36
ZNF70	433.031
SMARCA5	432.929
GANAB	432.727
SUGT1P1	432.637
AL031722.1	432.612
KHDRBS1	432.547
VEZF1	430.714
FAM120C	430.696
SLX4IP	430.555
GAS5-AS1	429.803
PARS2	429.625
KPNA3	429.584
ZFP3	429.48
TUFM	429.053
DAD1	428.705
GPKOW	428.637
ALDH1B1	428.499
HNRNPH2	427.831
ARF6	427.74
RBM12	426.724
FBXO30	426.195
ZNF486	425.711
HADHA	425.699
MRPL45	425.692
WDR3	421.683
AGPS	421.481
GLE1	421.346
GALNT1	421.036
RPN1	420.998
RNU6-722P	420.789
RTL6	420.068
AL513165.1	419.383
AL354892.2	419.358
ZNF282	419.319
ZKSCAN8	419.235
YIPF6	418.442
NCOA5	418.112
TTPAL	417.454
BUD13	416.686
MAML2	416.314
HNRNPKP1	416.217
ZNF92	415.912
ASNA1	415.725
NELFB	415.671
RPN2	415.455
TGS1	415.424
DOLPP1	415.317
USP13	415.238
DDX28	415.071
ZNF687	414.934
ZFAND3	414.611
BLOC1S4	414.005
SGPL1	413.839
NCOA4	413.819
RNF5	413.59
TMX1	413.536
PBDC1	413.322
CBL	413.234
PRKAR2A	412.7
ABT1	412.054
ZDHHC15	411.963
ADNP2	411.809
AL355574.1	411.762
WNK3	411.677
CPSF3	411.316
ALG10B	410.831
C6orf62	410.802
DEGS1	410.746
TMEM115	409.63
HSD17B1P1	408.892
VCPIP1	408.859
ZNF619	408.855
VPS18	408.626
UBR7	407.78
ZNF260	407.523
NRAS	406.983
TFAM	406.97
EEFSEC	406.852
AC104532.2	406.351
ZNF557	406.282
RP2	406.177
C1orf56	405.568
LAPTM4A	405.535
HPS6	405.505
PPP1R8	405.16
